# Supplementary material for: Comparative Analysis of Secondary Metabolites Produced by Ascochyta fabae under In Vitro Conditions and Their Phytotoxicity on the Primary Host, Vicia faba, and Related Legume Crops
Source: MDPI journal article supplement (doi:10.3390/toxins15120693), 2023-12-09
Supplement: s1 [file s1]

# Supplementary Materials: Comparative analysis of secondary metabolites produced by *Ascochyta fabae* under *in vitro* conditions and their phytotoxicity on the primary host, *Vicia faba*, and related legume crops

Eleonora Barilli, Pierluigi Reveglia, Francisco Jesús Agudo-Jurado, Vanessa Cañete García, Alessio Cimmino, Antonio Evidente and Diego Rubiales

## Supporting Information List

**Supplementary Figure 1.** <sup>1</sup>H NMR spectrum of ascochlorin (**1**) (CDCl<sub>3</sub>, 400 MHz).

**Supplementary Figure 2.** ESI/MS (+) spectrum of ascochlorin (**1**).

**Supplementary Figure 3.** <sup>1</sup>H NMR spectrum of ascofuranol (**2**) (CDCl<sub>3</sub>, 400 MHz).

**Supplementary Figure 4.** ESI/MS (+) spectrum of ascofuranol (**2**).

**Supplementary Figure 5.** <sup>1</sup>H NMR spectrum of (*R*)-mevalonolactone (**3**) (CDCl<sub>3</sub>, 400 MHz).

**Supplementary Figure 6.** ESI/MS (+) spectrum of (*R*)-mevalonolactone (**3**).

**Supplementary Figure 7.** <sup>1</sup>H NMR spectrum of ascosalipyrone (**4**) (CDCl<sub>3</sub>, 400 MHz).

**Supplementary Figure 8.** ESI/MS (+) spectrum of ascosalipyrone (**4**).

**Supplementary Figure 9.** <sup>1</sup>H NMR spectrum of benzoic acid (**5**) (CDCl<sub>3</sub>, 400 MHz).

**Supplementary Figure 10.** ESI/MS (+) spectrum of benzoic acid (**5**).

**Supplementary Figure 11.** <sup>1</sup>H NMR spectrum of tyrosol (**6**) (CDCl<sub>3</sub>, 400 MHz).

**Supplementary Figure 12.** ESI/MS (+) spectrum of tyrosol (**6**).

**Supplementary Figure 13.** <sup>1</sup>H NMR spectrum of ascosalitoxin (**7**) (CDCl<sub>3</sub>, 400 MHz).

**Supplementary Figure 14.** ESI/MS (+) spectrum of ascosalitoxin (**7**).

**Supplementary Figure 15.** Symptoms developed on detached leaves of several legume hosts treated as follow: (a) uninoculated, (b) water, (c) methanol (MeOH 5%), (d) ascoclorin, (e) ascofuranol, (f) (*R*)-mevalonolactone, (g) ascosalipyrone, (h) benzoic acid, (i) tyrosol and (j) ascosalitoxin.

**Supplementary Table 1.** Diseased area (mm<sup>2</sup>) measured on detached leaves of several legume crops with exudates from the fungus *Ascochyta fabae* growth *in vitro* on 3 different culture media (Czapek-Dox = CD, Potato Dextrose Broth = PDB and rice) at concentrations of 0.5, 1 and 2 mg/mL. Negative (blank untreated, water and MeOH 5%) controls were also included. The experiment was repeated four times.

**Supplementary Table 2.** Diseased area (mm<sup>2</sup>) measured in leaves detached from various legume crops with metabolites produced by the exudate of the *Ascochyta fabae* fungus from the three-growth media at concentrations of 1, 10 and 100 μM. Negative controls (untreated blank, water and MeOH 5%) were also included. *P*-value compared with value from MeOH 5% control.

**Supplementary Figure 1.**  $^1\text{H}$  NMR spectrum of ascochlorin (**1**) ( $\text{CDCl}_3$ , 400 MHz).

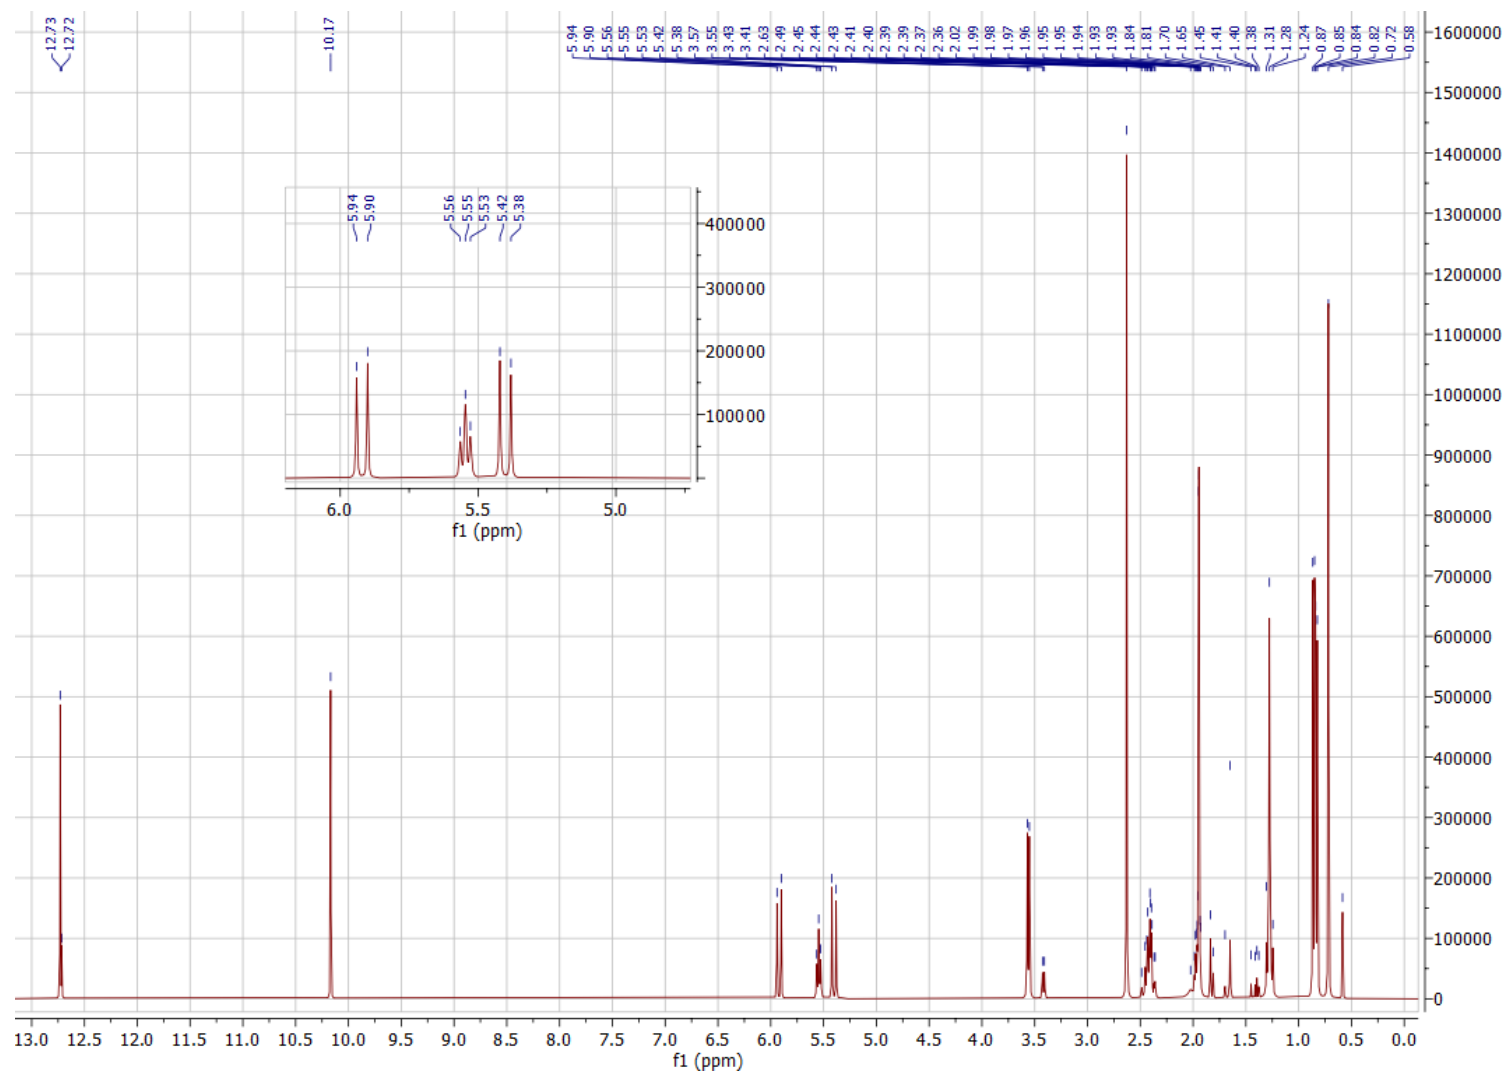

**Supplementary Figure 2.** ESI/MS (+) spectrum of ascochlorin (**1**).

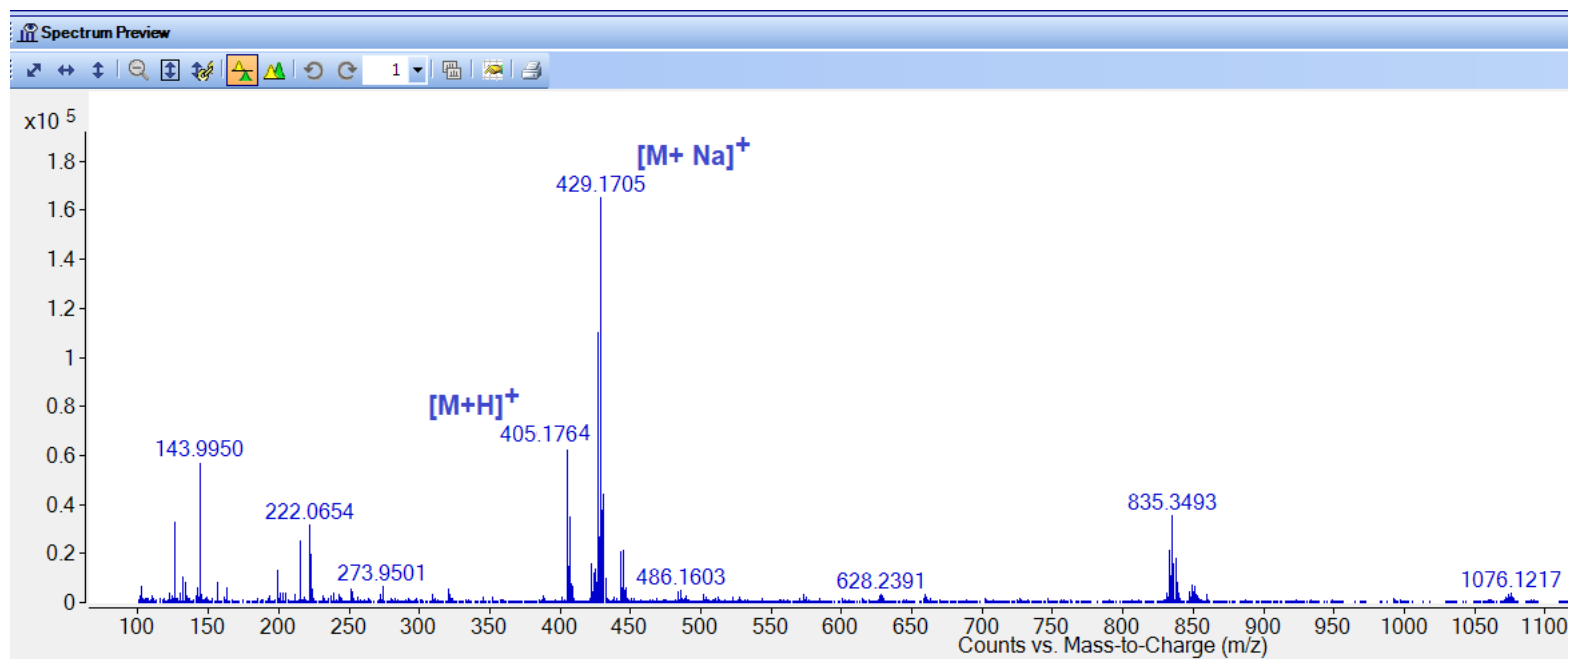

**Supplementary Figure 3.**  $^1\text{H}$  NMR spectrum of ascofuranol (**2**) ( $\text{CDCl}_3$ , 400 MHz).

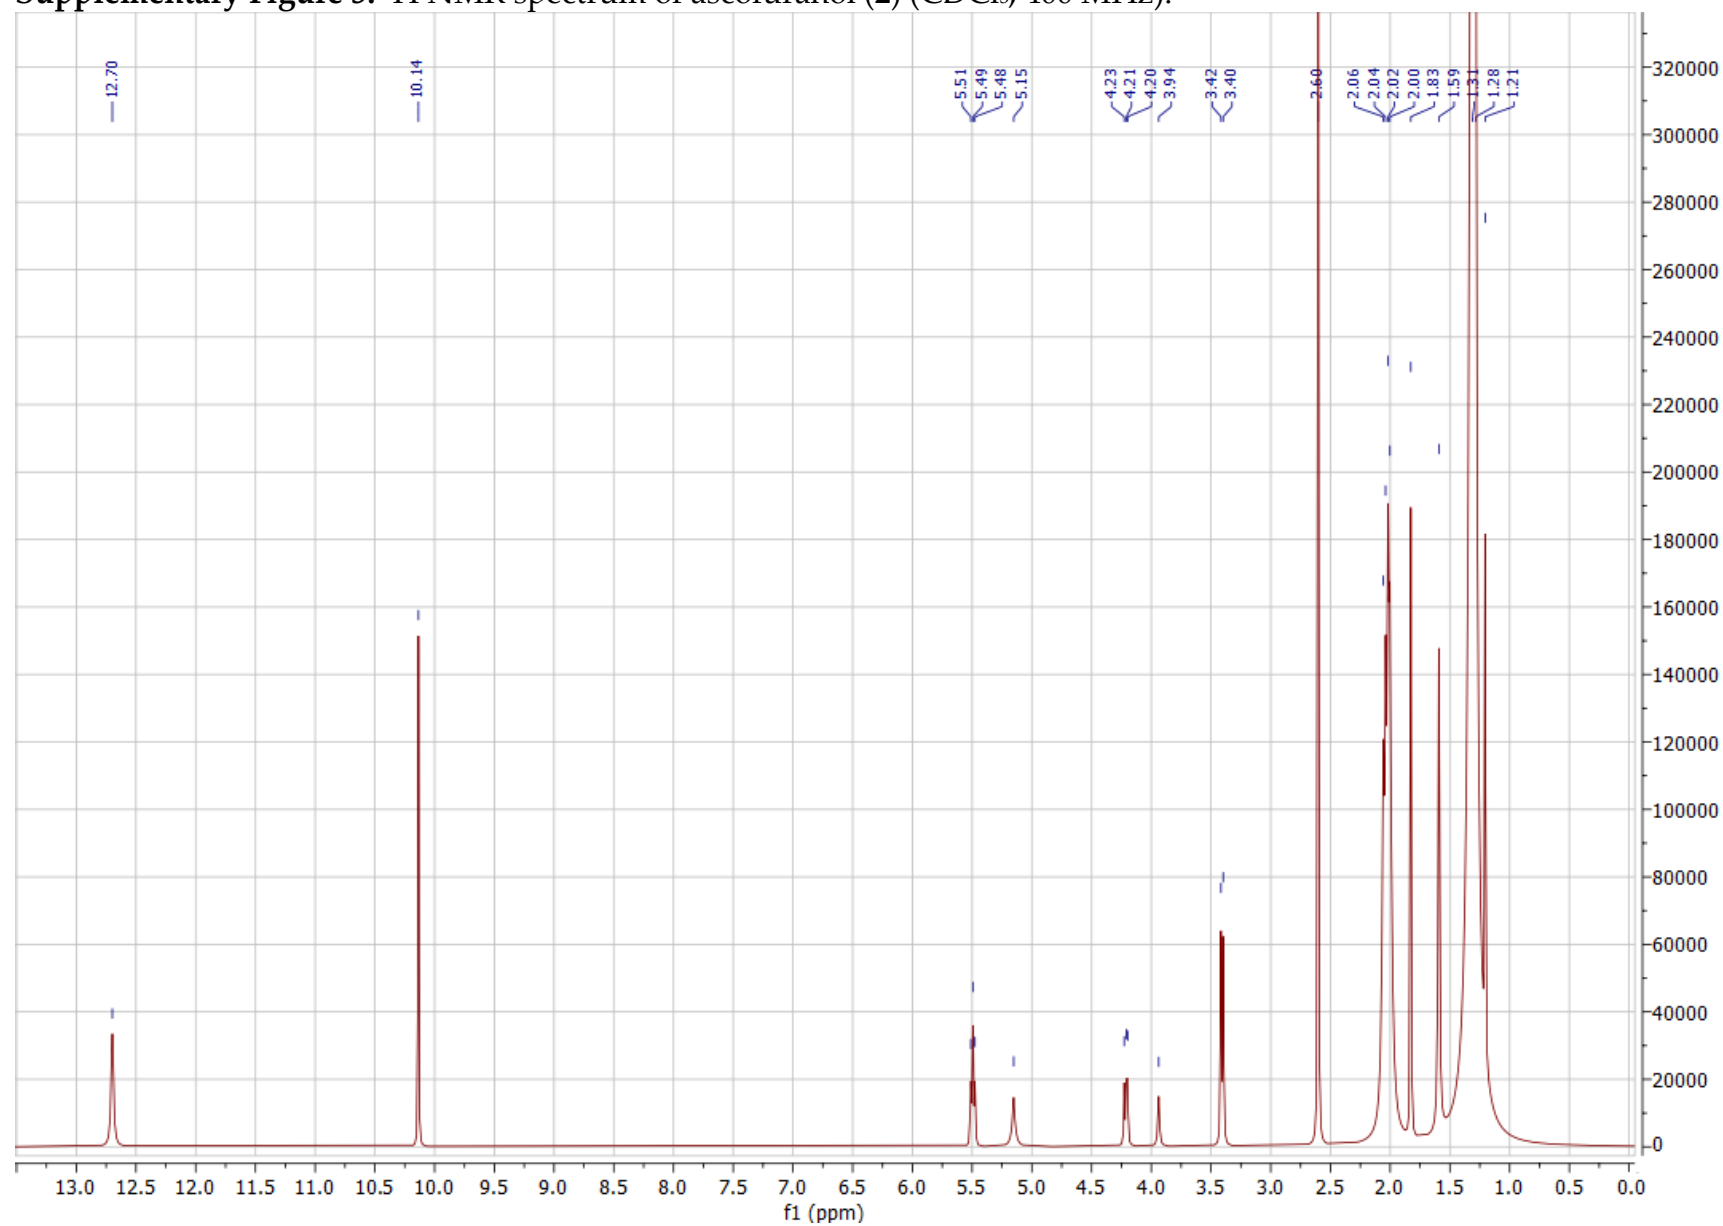

**Supplementary Figure 4.** ESI/MS (+) spectrum of ascofuranol (**2**).

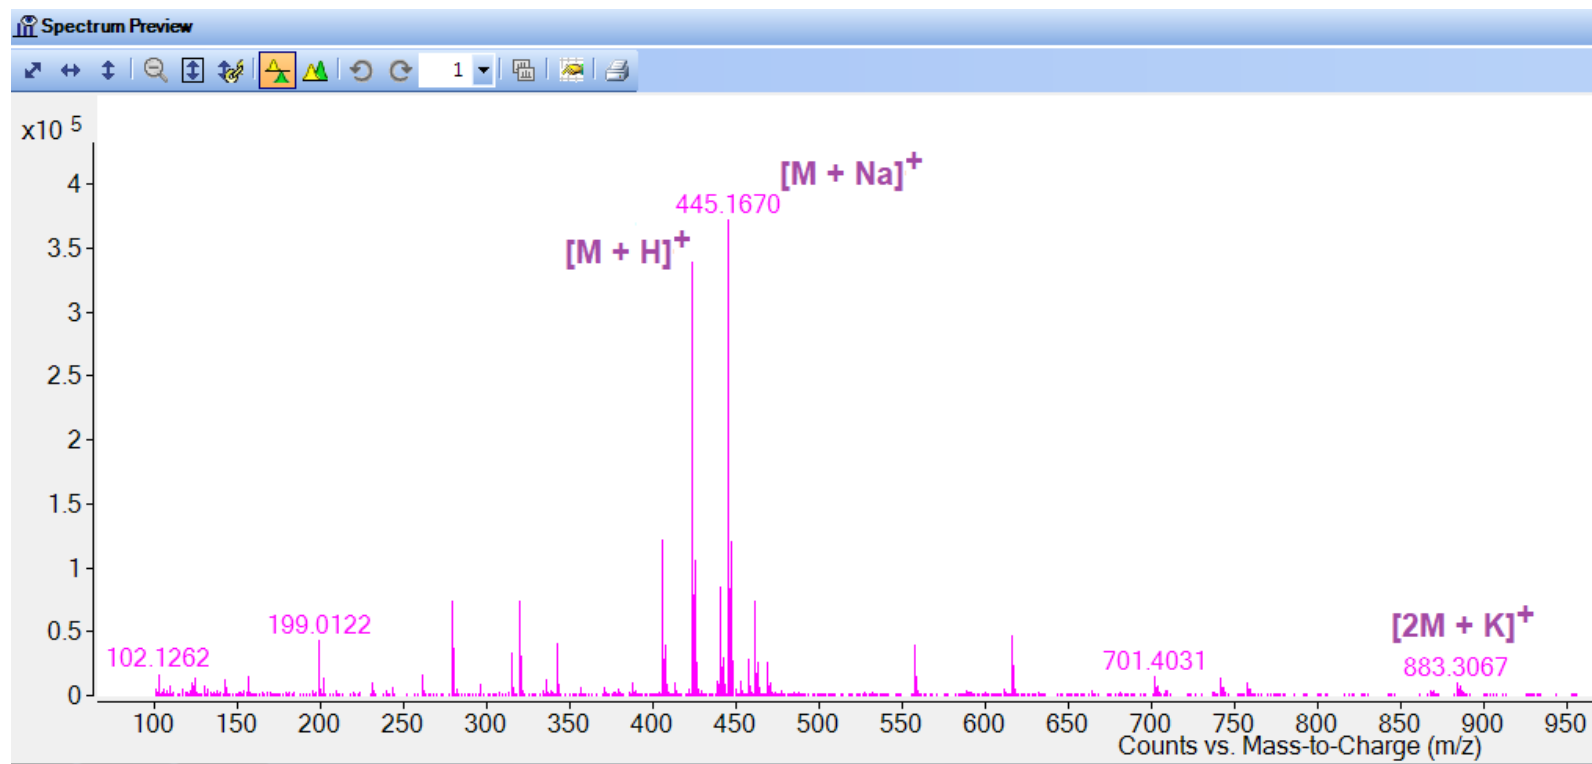

**Supplementary Figure 5.**  $^1\text{H}$  NMR spectrum of (*R*)-mevalonolactone (**3**) ( $\text{CDCl}_3$ , 400 MHz).

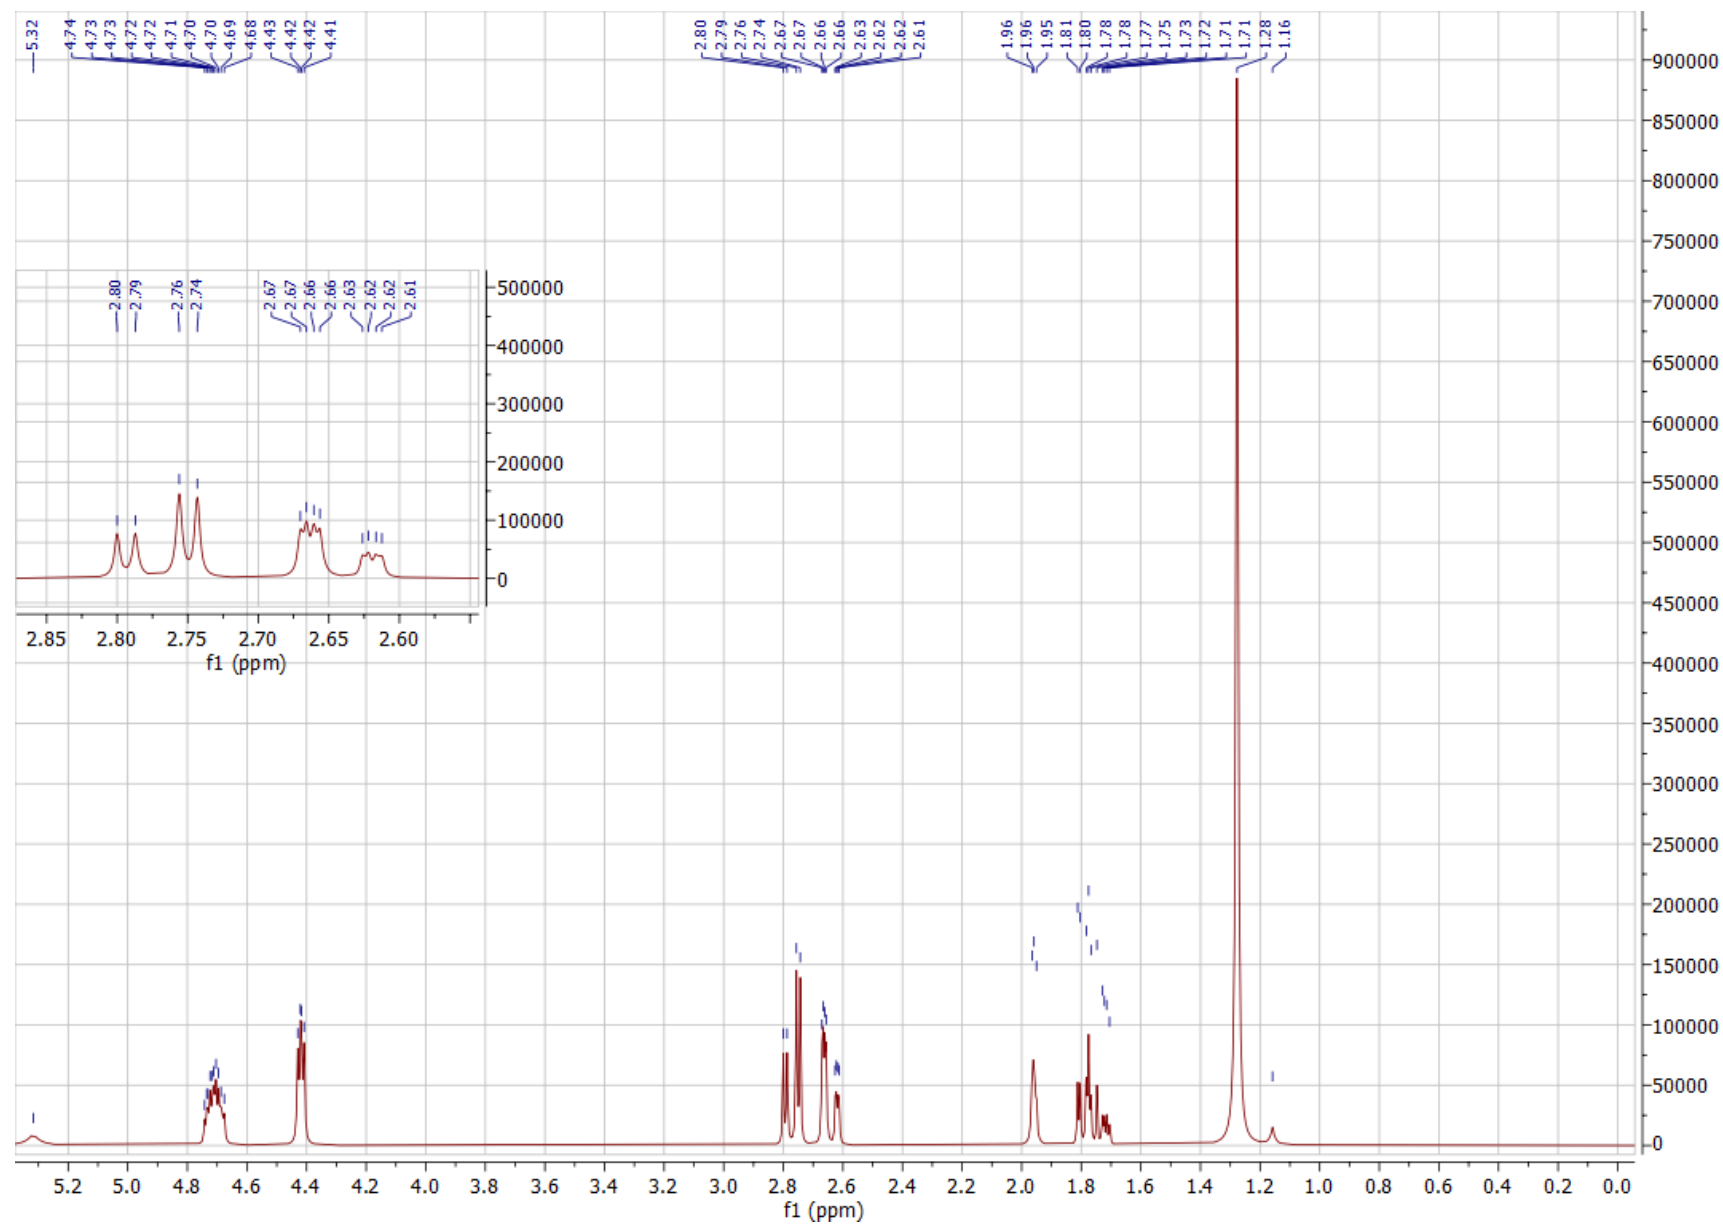

**Supplementary Figure 6.** ESI/MS (+) spectrum of (*R*)-mevalonolactone (**3**).

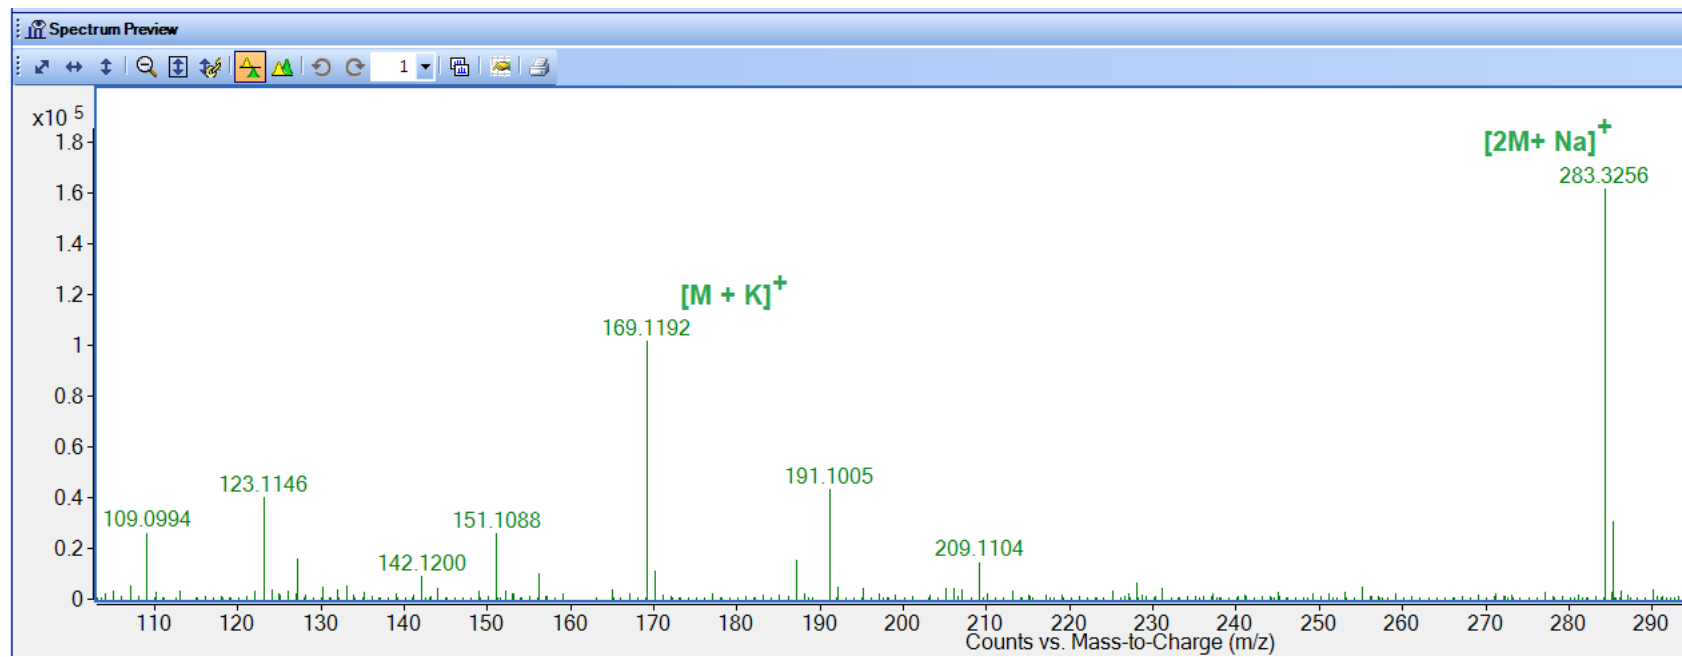

**Supplementary Figure 7.**  $^1\text{H}$  NMR spectrum of ascosalipyrone (**4**) ( $\text{CDCl}_3$ , 400 MHz).

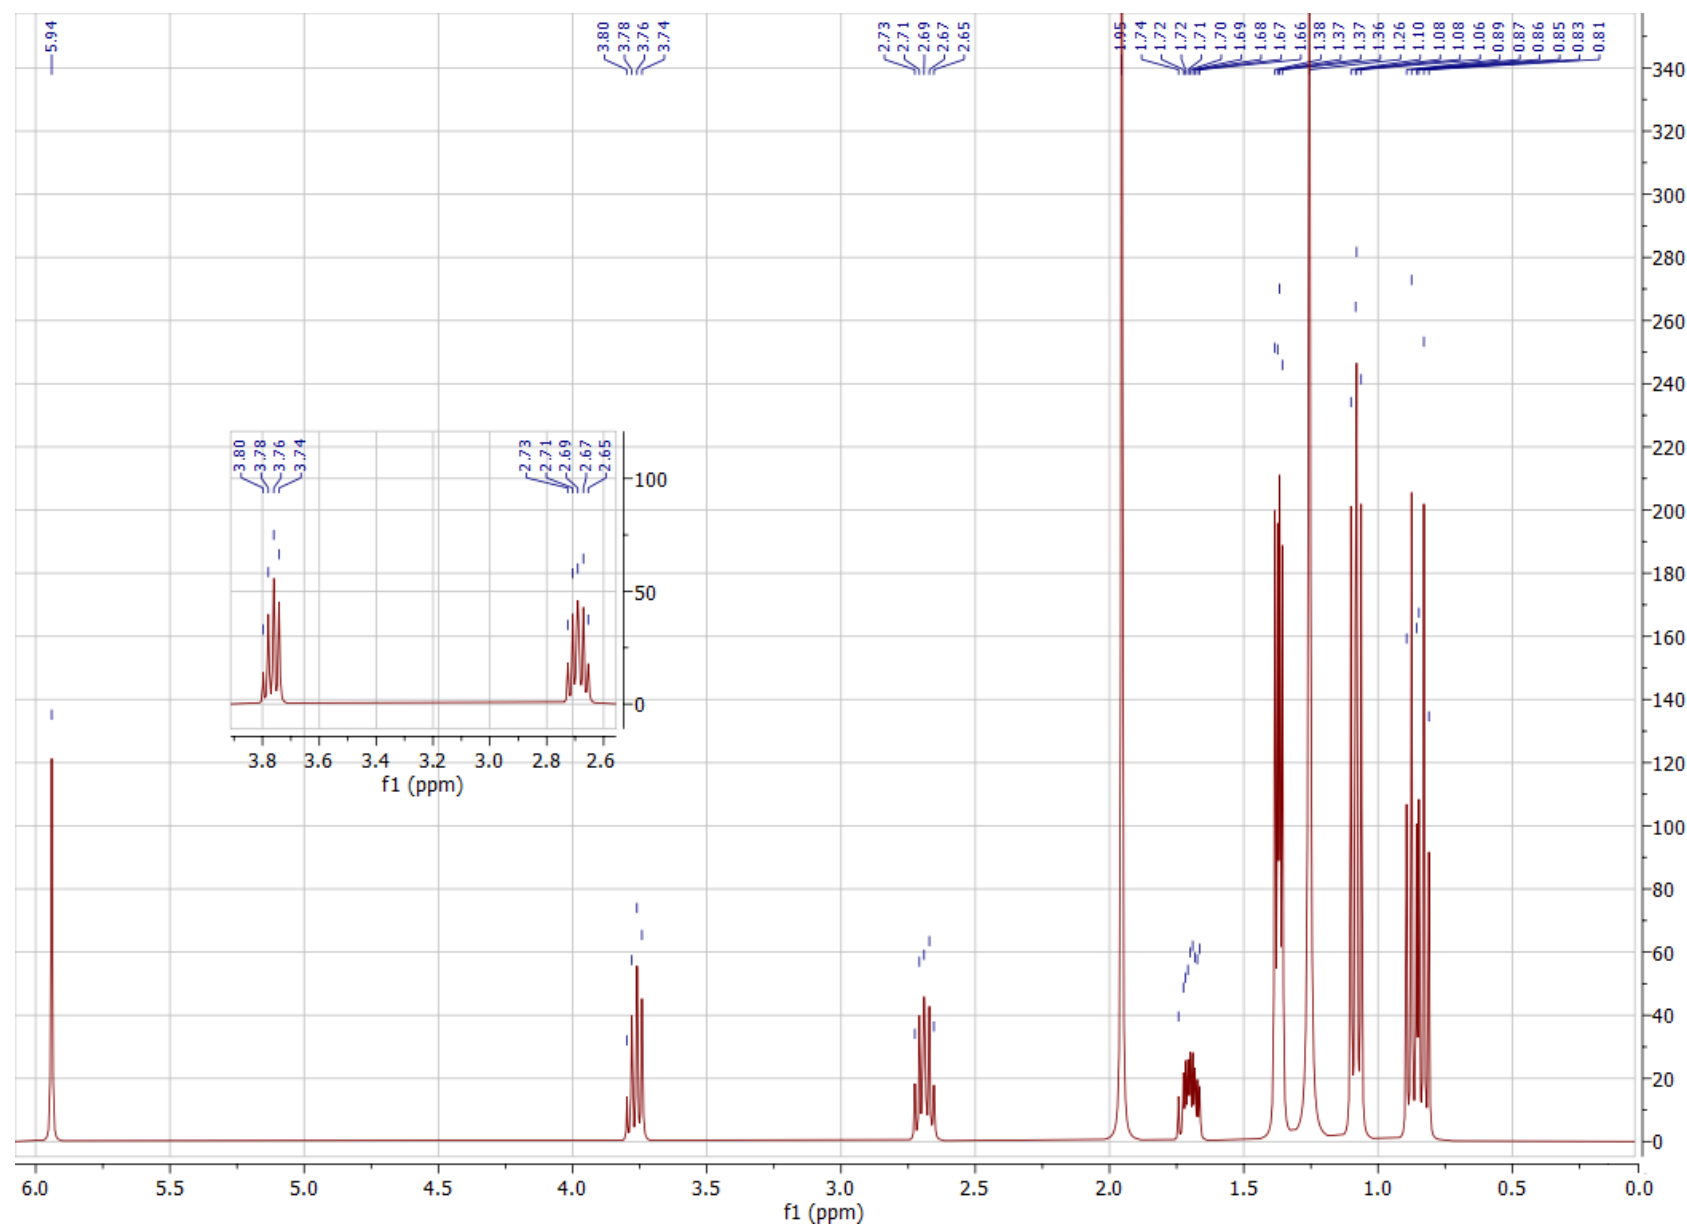



Supplementary Figure 8. ESI/MS (+) spectrum of ascosalipyrone (4).

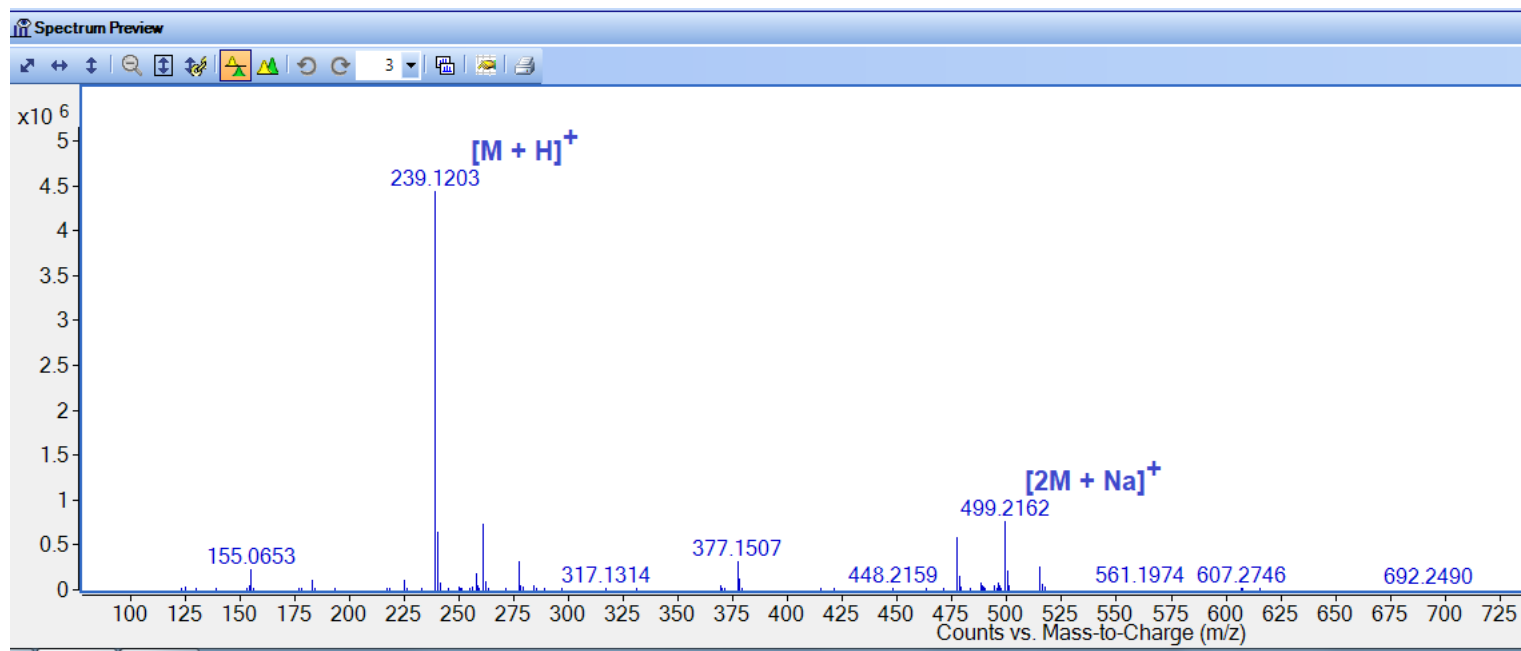

**Supplementary Figure 9.**  $^1\text{H}$  NMR spectrum of benzoic acid (**5**) ( $\text{CDCl}_3$ , 400 MHz).

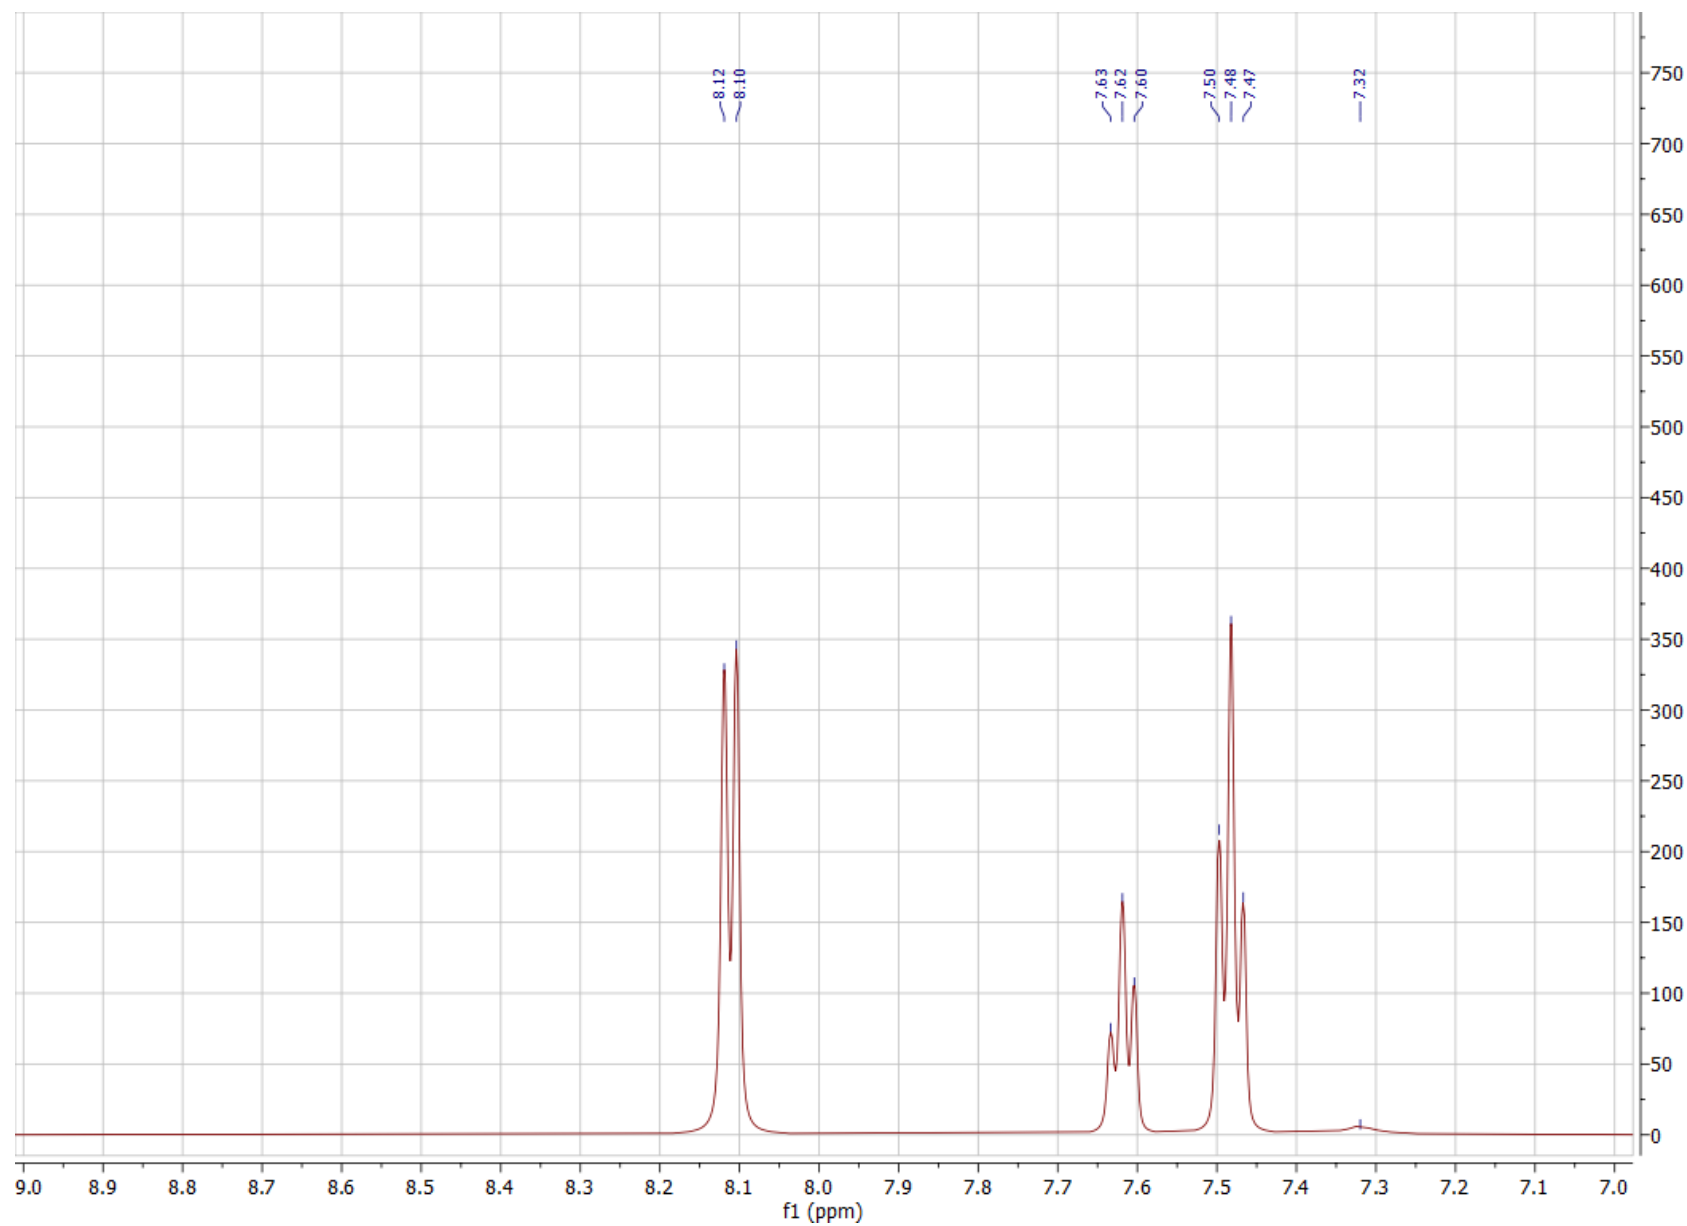

Supplementary Figure 10. ESI/MS (+) spectrum of benzoic acid (5).

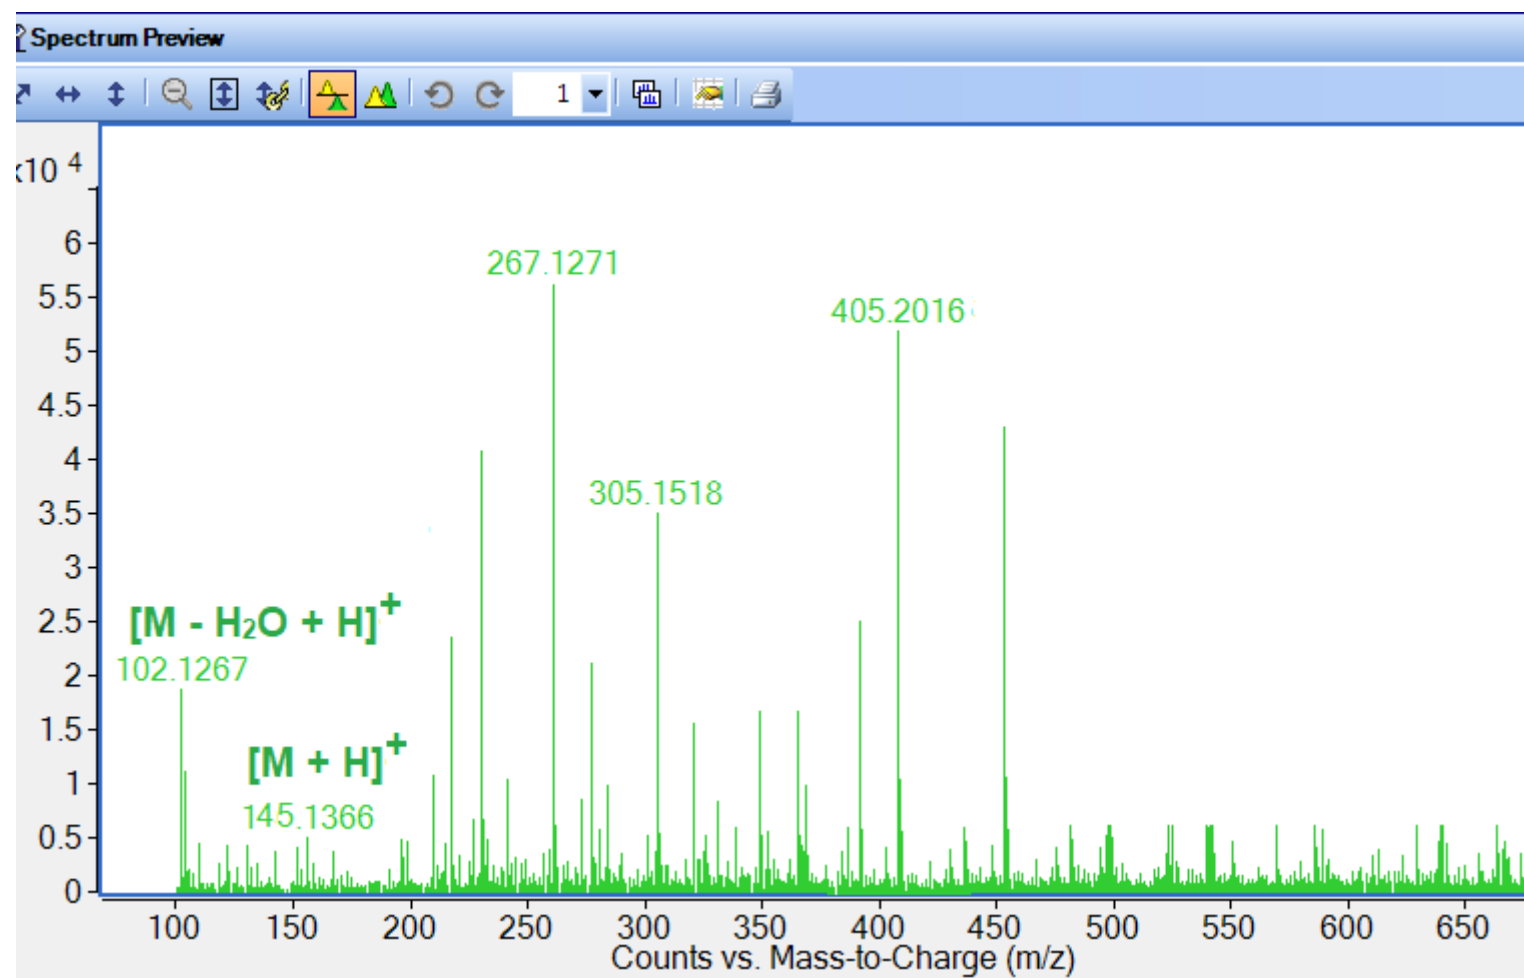

**Supplementary Figure 11.**  $^1\text{H}$  NMR spectrum of tyrosol (**6**) ( $\text{CDCl}_3$ , 400 MHz).

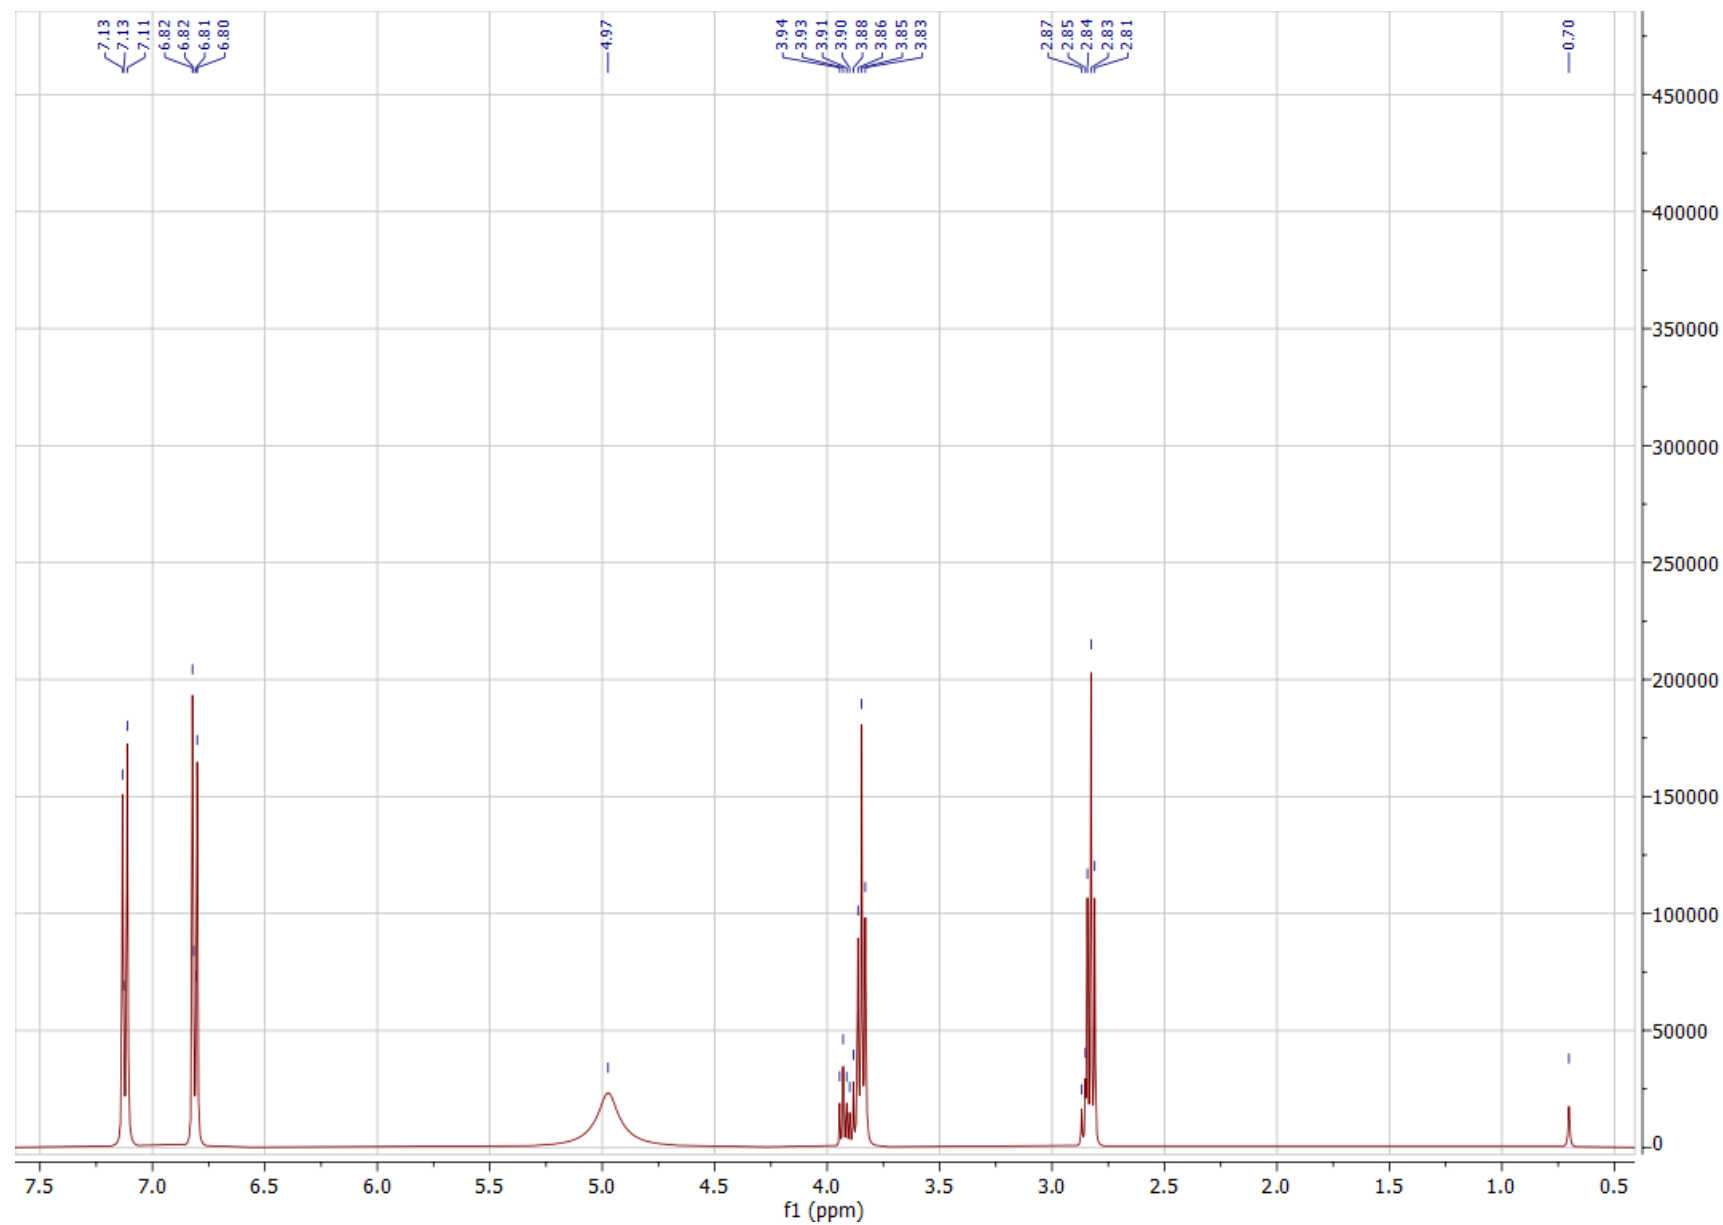

Supplementary Figure 12. ESI/MS (+) spectrum of tyrosol (6).

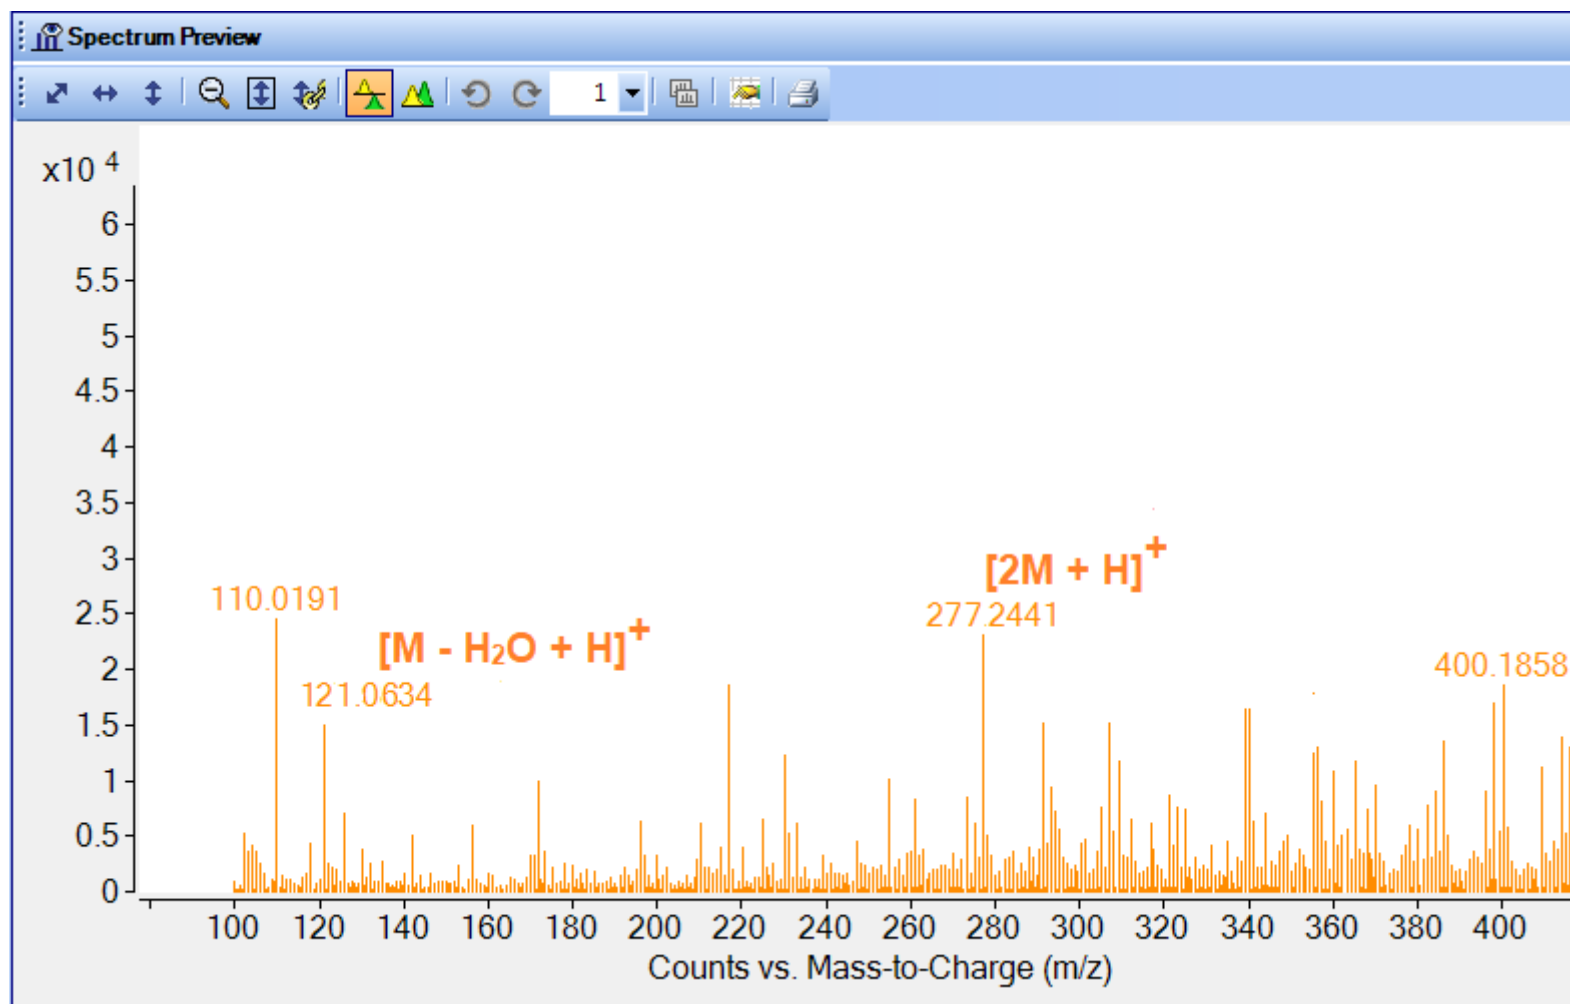

**Supplementary Figure 13.**  $^1\text{H}$  NMR spectrum of ascosalitoxin (7) ( $\text{CDCl}_3$ , 400 MHz).

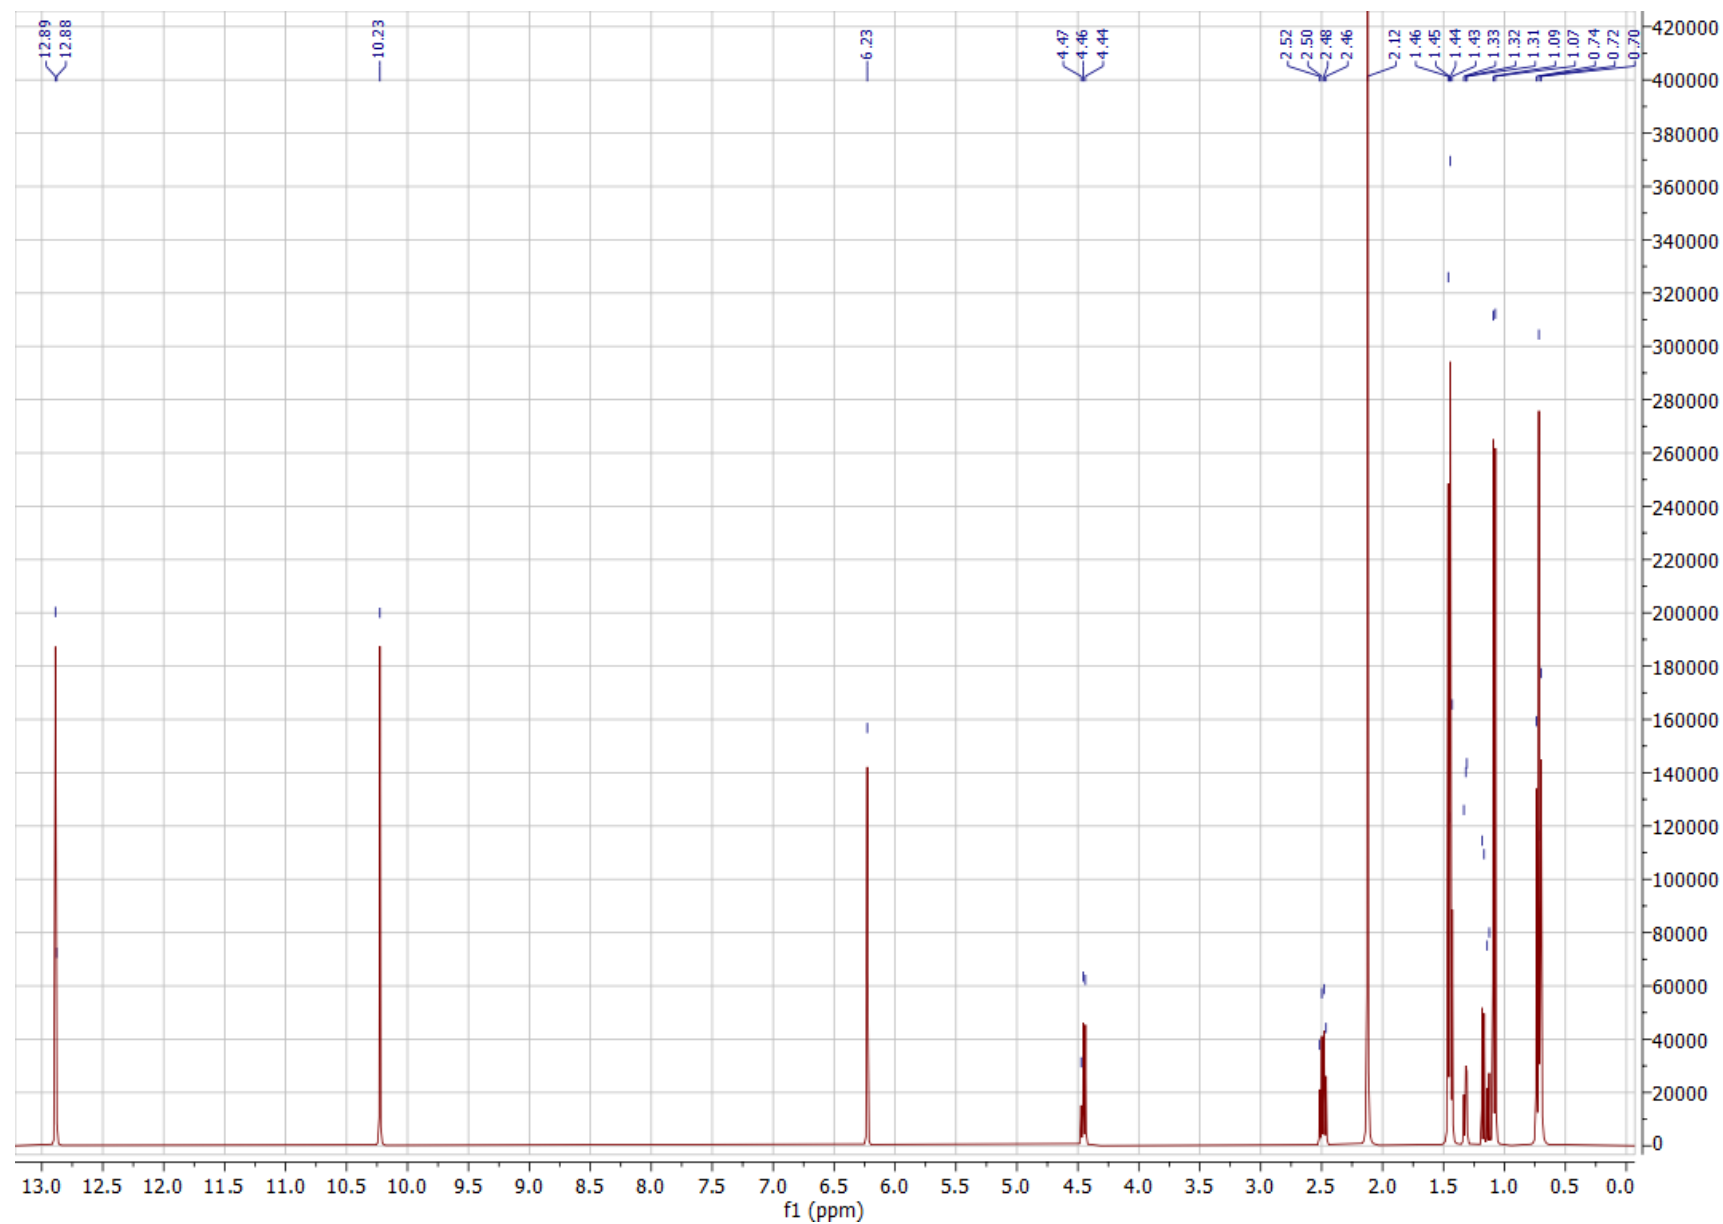

**Supplementary Figure 14.** ESI/MS (+) spectrum of ascosalitoxin (7).

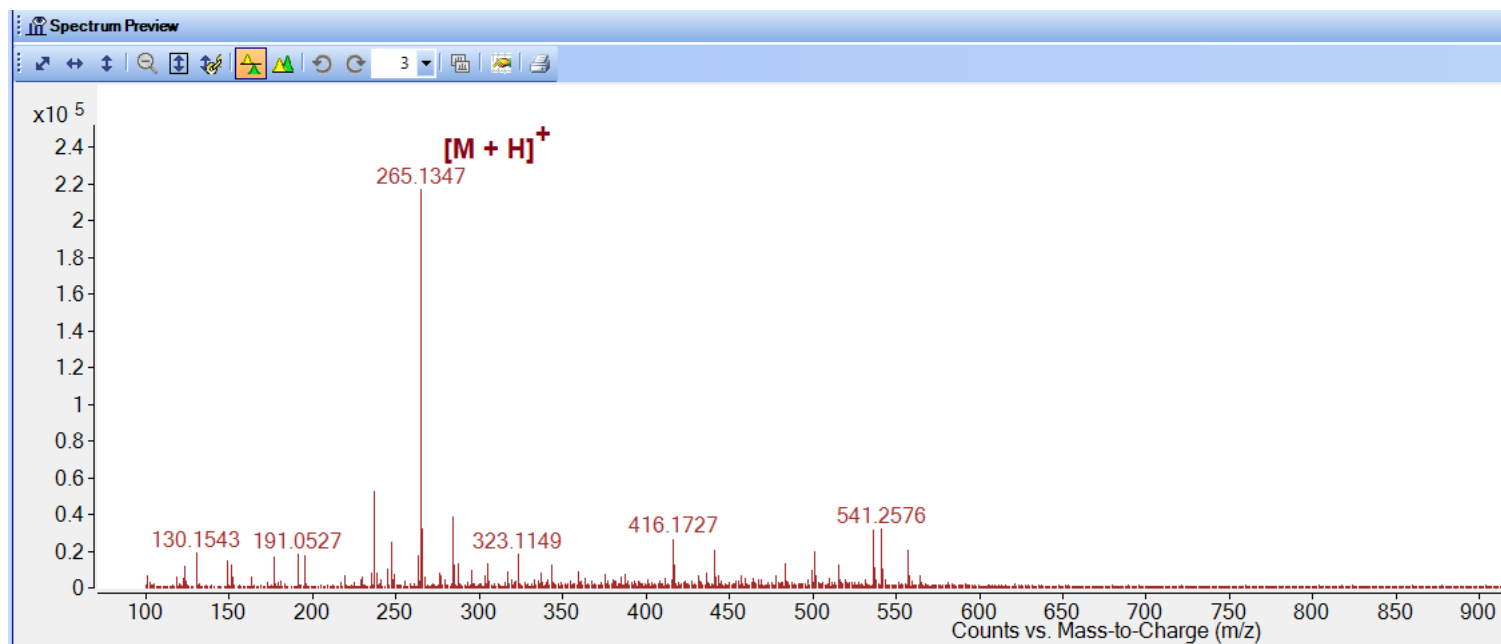

**Supplementary Figure 15.** Images of the symptoms of each of the compounds.

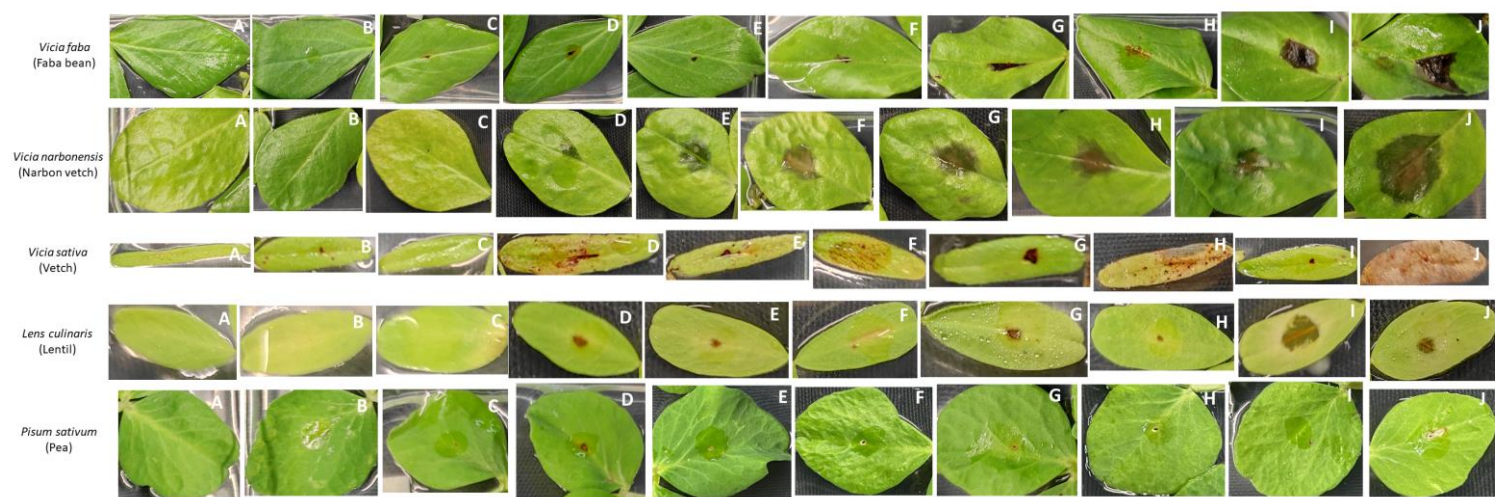

**Figure 15.** Symptoms developed on detached leaves of several legume hosts treated as follow: (a) uninoculated, (b) water, (c) methanol (MeOH 5%), (d) ascoclorin, (e) ascofuranol, (f) (*R*)-mevalonolactone, (g) ascosalipyron, (h) benzoic acid, (i) tyrosol and (j) ascosalitoxin.



**Supplementary Table 1.** Diseased area (mm<sup>2</sup>) measured on detached leaves of several legume crops with exudates from the fungus *Ascochyta fabae* growth in vitro on 3 different culture media (Czapek-Dox = CD, Potato Dextrose Broth = PDB and Rice) at concentrations of 0.5, 1 and 2 mg/mL. Negative (blank untreated, water and MeOH 5%) controls were also included. The experiment was repeated four times.

| Treatment                      | <i>Host plant</i> |   |              |   |              |    |          |    |           |   |
|--------------------------------|-------------------|---|--------------|---|--------------|----|----------|----|-----------|---|
|                                | Faba bean         |   | Narbon vetch |   | Common vetch |    | Lentil   |    | Pea       |   |
| <b>Concentration 0.5 mg/mL</b> |                   |   |              |   |              |    |          |    |           |   |
| Blank                          | 0.0±0.0           | b | 0.0±0.0      | d | 0.0±0.0      | b  | 0.0±0.0  | b  | 0.0±0.0   | c |
| Water                          | 0.0±0.0           | b | 2.9±1.6      | d | 0.2±0.1      | b  | 0.0±0.0  | b  | 0.3±0.2   | c |
| MeOH                           | 3.4±1.5           | b | 17.3±3.3     | c | 0.2±0.2      | b  | 0.5±0.5  | b  | 0.4±0.2   | c |
| CD                             | 45.2±11.1         | a | 65.3±17.1    | a | 25.6±4.7     | a  | 16.1±8.5 | a  | 16.1±3.6  | a |
| PDB                            | 63.8±29.1         | a | 53.5±8.9     | a | 16.8±9.2     | a  | 0.0±0.0  | b  | 9.9±6.5   | b |
| Rice                           | 61.7±16.3         | a | 36.9±4.7     | b | 3.9±3.4      | b  | 0.0±0.0  | b  | 7.8±2.6   | b |
| <b>Concentration 1 mg/mL</b>   |                   |   |              |   |              |    |          |    |           |   |
| Blank                          | 0.0±0.0           | c | 0.0±0.0      | d | 0.0±0.0      | b  | 0.0±0.0  | b  | 0.0±0.0   | c |
| Water                          | 0.0±0.0           | c | 2.9±1.6      | d | 0.2±0.1      | b  | 0.0±0.0  | b  | 0.3±0.2   | c |
| MeOH                           | 3.4±1.5           | c | 17.3±3.3     | c | 0.2± 0.1     | b  | 0.6± 0.5 | b  | 0.4±0.2   | c |
| CD                             | 58.7±10.2         | a | 65.9±6.4     | a | 27.4±14.6    | a  | 21.5±9.5 | a  | 18.1±2.6  | a |
| PDB                            | 43.3±8.3          | b | 36.5±5.5     | a | 19.0±7.4     | a  | 4.2±3.9  | ab | 8.1±4.4   | b |
| Rice                           | 82.3±24.5         | a | 47.6±19.3    | b | 30.1±10.4    | a  | 16.9±7.5 | a  | 12.3±4.4  | b |
| <b>Concentration 2 mg/mL</b>   |                   |   |              |   |              |    |          |    |           |   |
| Blank                          | 0.0±0.0           | b | 0.0±0.0      | b | 0.0±0.0      | c  | 0.0±0.0  | c  | 0.0±0.0   | b |
| Water                          | 0.0±0.0           | b | 2.9±1.6      | d | 0.2±0.1      | b  | 0.0±0.0  | b  | 0.3±0.2   | c |
| MeOH                           | 3.4±1.5           | c | 17.3±3.3     | c | 0.2±0.2      | b  | 0.5±0.4  | b  | 0.4±0.3   | c |
| CD                             | 215.0±65.4        | a | 144.4±1.8    | a | 37.3±7.8     | ab | 20.6±7.8 | a  | 80.7±57.4 | a |
| PDB                            | 157.0±25.33       | a | 43.9±7.9     | b | 44.2±12.9    | a  | 1.6±0.8  | bc | 4.0±1.9   | b |
| Rice                           | 94.4±22.8         | b | 31.9±2.8     | b | 26.0±11.7    | b  | 11.5±4.8 | ab | 9.2±3.4   | b |

Values, per column and treatment, followed by different letters differ significantly at  $P < 0.01$ .

**Table 2.** Diseased area (mm<sup>2</sup>) measured in leaves detached from various legume crops with compounds produced by the exudate of the *Ascochyta fabae* fungus from the three-growth media at concentrations of 1, 10 and 100µM. Negative controls (untreated blank, water and MeOH 5%) were also included. *P*-value compared with value from MeOH 5% control.

| Damage Area (mm <sup>2</sup> ) |       | <i>Vicia faba</i><br>(cv. Baraca) |          | <i>Vicia narbonensis</i><br>(cv. Saoret) |          | <i>Vicia sativa</i><br>(cv. Buzza) |          | <i>Lens culinaris</i><br>(cv. Pardina) |          | <i>Pisum sativum</i><br>(cv. Messire) |          |
|--------------------------------|-------|-----------------------------------|----------|------------------------------------------|----------|------------------------------------|----------|----------------------------------------|----------|---------------------------------------|----------|
|                                |       | Mean                              | p value  | Mean                                     | p value  | Mean                               | p value  | Mean                                   | p value  | Mean                                  | p value  |
| Blank                          |       | 1.0±0.1                           | -        | 0.7±0.01                                 | -        | 2.9±0.7                            | -        | 0.1±0.1                                | -        | 0.3±0.1                               | -        |
| Water                          |       | 5.0±0.9                           | -        | 3.6±0.8                                  | -        | 2.6±0.5                            | -        | 0.9±0.2                                | -        | 1.3±0.2                               | -        |
| MeOH                           |       | 6.0±1.1                           | -        | 3.8±0.9                                  | -        | 3.3±0.7                            | -        | 1.3±0.3                                | -        | 1.2±0.2                               | -        |
| Ascochlorin (1)                | 1µM   | 12.1±2.9                          | 0.011*   | 17.8±3.5                                 | <0.001*  | 5.6±2.5                            | 0.154    | 1.7±0.2                                | 0.394    | 1.7±0.4                               | 0.157    |
|                                | 10µM  | 12.7±4.2                          | 0.004*   | 16.0±4.8                                 | <0.001*  | 1.4±0.3                            | 0.183    | 1.0±0.2                                | 0.409    | 1.7±0.4                               | 0.169    |
|                                | 100µM | 14.0±1.9                          | <0.001*  | 22.9±4.0                                 | <0.001*  | 2.0±0.8                            | 0.35     | 1.3±0.1                                | 0.871    | 1.9±0.3                               | 0.067    |
| Ascofuranol (2)                | 1µM   | 4.7±1.4                           | 0.508    | 16.0±5.9                                 | <0.001*  | 0.9±0.1                            | 0.253    | 1.6±0.3                                | 0.554    | 1.4±0.2                               | 0.598    |
|                                | 10µM  | 8.5±2.5                           | 0.179    | 18.2±2.1                                 | <0.001*  | 5.8±3.4                            | 0.213    | 1.8±0.4                                | 0.295    | 1.5±0.4                               | 0.456    |
|                                | 100µM | 10.8±2.7                          | 0.011*   | 41.9±7.4                                 | <0.001*+ | 8.3±4.5                            | 0.019*   | 2.3±0.7                                | 0.055    | 3.0±1.2                               | <0.001*+ |
| (R)-mevalonolactone (3)        | 1µM   | 11.7±3.6                          | 0.25     | 8.0±2.5                                  | 0.221    | 0.8±0.1                            | 0.066    | 1.8±0.4                                | 0.387    | 1.6±0.2                               | 0.176    |
|                                | 10µM  | 12.9±2.5                          | 0.148    | 10.1±4.3                                 | 0.067    | 1.2±0.2                            | 0.112    | 1.6±0.5                                | 0.552    | 1.6±0.3                               | 0.255    |
|                                | 100µM | 20.6±11.5                         | 0.003*   | 30.5±9.7                                 | <0.001*+ | 2.4±0.9                            | 0.491    | 1.7±0.5                                | 0.457    | 1.5±0.4                               | 0.245    |
| Ascocalipyrone (4)             | 1µM   | 9.9±4.1                           | 0.229    | 5.3±2.6                                  | 0.696    | 1.8±1.0                            | 0.237    | 2.3±0.6                                | 0.073    | 1.8±0.4                               | 0.272    |
|                                | 10µM  | 12.7±4.6                          | 0.063    | 7.4±2.2                                  | 0.328    | 2.4±1.0                            | 0.48     | 2.2±0.4                                | 0.104    | 2.0±0.5                               | 0.175    |
|                                | 100µM | 18.4±6.5                          | <0.001*  | 46.1±11.9                                | <0.001*+ | 2.4±1.1                            | 0.498    | 2.5±0.8                                | 0.067    | 4.2±1.5                               | <0.001*+ |
| Benzoic acid (5)               | 1µM   | 7.2±2.2                           | 0.712    | 25.5±9.8                                 | <0.001*  | 1.7±0.8                            | 0.658    | 2.3±0.7                                | 0.193    | 1.4±0.2                               | 0.608    |
|                                | 10µM  | 11.8±3.6                          | 0.002*   | 24.4±9.2                                 | <0.001*  | 5.6±3.0                            | 0.498    | 2.0±0.7                                | 0.370    | 1.5±0.3                               | 0.501    |
|                                | 100µM | 16.6±6.3                          | 0.003*   | 27.3±6.6                                 | <0.001*  | 16.5±9.6                           | <0.001*+ | 4.0±1.8                                | <0.001*+ | 3.1±1.3                               | <0.001*+ |
| Tyrosol (6)                    | 1µM   | 18.5± 4.1                         | 0.008*   | 27.2±5.3                                 | <0.001*  | 2.2±0.8                            | 0.415    | 1.3±0.4                                | 0.945    | 1.1±0.2                               | 0.653    |
|                                | 10µM  | 17.7±6.3                          | 0.016*   | 24.2±6.4                                 | <0.001*  | 1.7±0.5                            | 0.209    | 1.6±0.3                                | 0.786    | 0.8±0.1                               | 0.177    |
|                                | 100µM | 20.5±8.8                          | <0.001*  | 31.9±5.8                                 | <0.001*  | 3.3±1.6                            | 0.977    | 7.3±3.2                                | <0.001*+ | 0.9±0.1                               | 0.413    |
| Ascocalitoxin (7)              | 1µM   | 9.9±2.3                           | 0.187    | 39.1±4.8                                 | <0.001*  | 5.0±3.2                            | 0.597    | 0.9±0.4                                | 0.375    | 1.6±0.3                               | 0.293    |
|                                | 10µM  | 29.8±6.4                          | <0.001*  | 40.6±5.1                                 | <0.001*  | 3.9±1.4                            | 0.829    | 1.3±0.5                                | 0.882    | 1.2±0.1                               | 0.856    |
|                                | 100µM | 26.2±5.7                          | <0.001*+ | 36.5±15.9                                | <0.001*  | 20.0±7.8                           | <0.001*+ | 1.7±0.3                                | 0.438    | 3.7±0.7                               | <0.001*+ |

Asterisk (\*) indicates values significantly different from control MeOH 5%. Within each metabolite, the symbol (+) indicates significant differences between the concentrations tested.
